# Supplementary material for: Association between Epstein-Barr virus serological reactivation and psychological distress: a cross-sectional study of Japanese community-dwelling older adults
Source: publisher site journal article supplement (doi:10.18632/aging.204345), 2022-10-21
Supplement: Supplementary file [file aging-v14i20-204345-supplementary-material-SD1.pdf]

SUPPLEMENTARY FIGURE

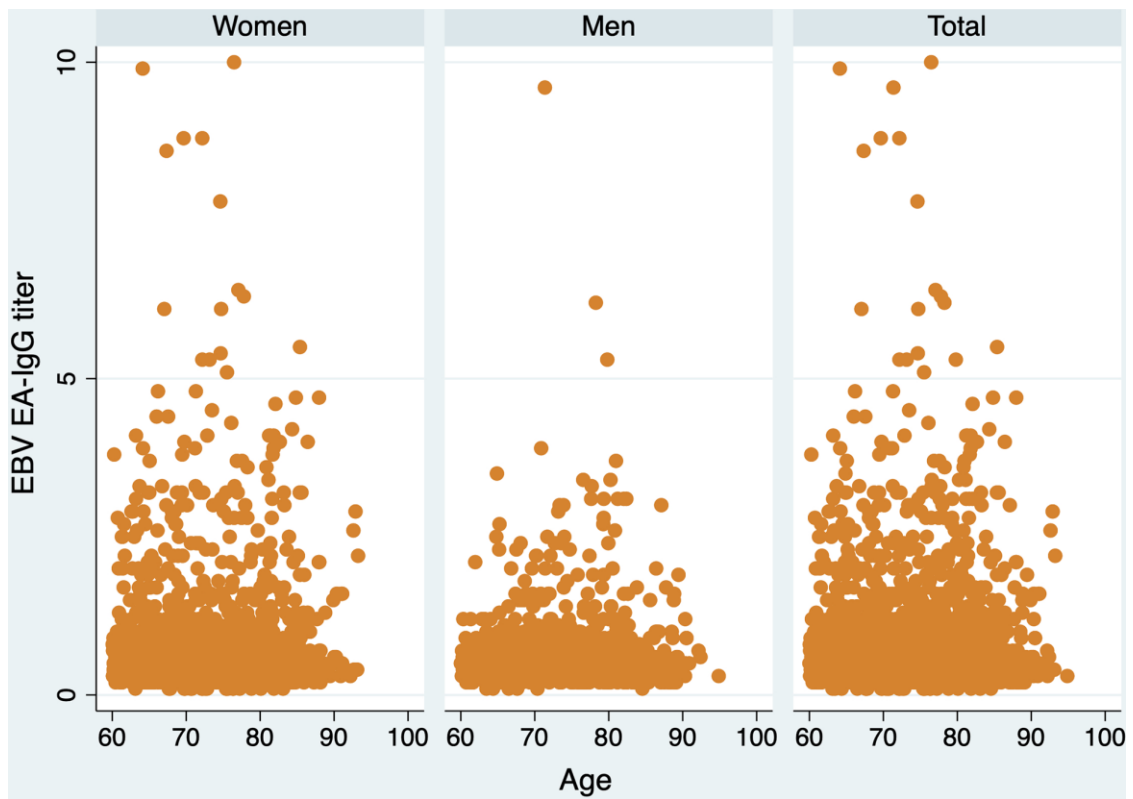

Supplementary Figure 1. Scatterplot of EBV EA-IgG titers and age.
