# Supplementary material for: Association between Epstein-Barr virus serological reactivation and psychological distress: a cross-sectional study of Japanese community-dwelling older adults
Source: publisher site journal article supplement (doi:10.18632/aging.204345), 2022-10-21
Supplement: Supplementary file [file aging-v14i20-204345-supplementary-material-SD2.pdf]

## SUPPLEMENTARY TABLE

**Supplementary Table 1. Odds ratios (ORs) and 95% confidence intervals (CIs) for Epstein-Barr virus serological reactivation and psychological distress by age group.**

|                            | Epstein-Barr virus serological reactivation |                   |       | Epstein-Barr virus serological reactivation |                   |       |
|----------------------------|---------------------------------------------|-------------------|-------|---------------------------------------------|-------------------|-------|
|                            | Negative                                    | Positive          | P     | Negative                                    | Positive          | P     |
|                            | Younger age group (60-72)                   |                   |       | Older age group (72-94)                     |                   |       |
| Psychological distress     |                                             |                   |       |                                             |                   |       |
| All participants           |                                             |                   |       |                                             |                   |       |
| No. of participants        | 1197                                        | 214               |       | 1161                                        | 249               |       |
| No. of cases (%)           | 87 (7.3)                                    | 20 (9.4)          |       | 105 (9.0)                                   | 33 (13.3)         |       |
| Crude ORs                  | 1.00                                        | 1.32 (0.79, 2.19) | 0.292 | 1.00                                        | 1.54 (1.01, 2.33) | 0.044 |
| Multivariable adjusted ORs | 1.00                                        | 1.18 (0.70, 1.98) | 0.530 | 1.00                                        | 1.41 (0.93, 2.16) | 0.109 |
| Women                      |                                             |                   |       |                                             |                   |       |
| No. of participants        | 725                                         | 156               |       | 719                                         | 172               |       |
| No. of cases (%)           | 63 (8.7)                                    | 16 (10.3)         |       | 76 (10.6)                                   | 30 (17.4)         |       |
| Crude ORs                  | 1.00                                        | 1.20 (0.67, 2.14) | 0.535 | 1.00                                        | 1.79 (1.13, 2.83) | 0.013 |
| Multivariable adjusted ORs | 1.00                                        | 1.07 (0.59, 1.94) | 0.820 | 1.00                                        | 1.73 (1.08, 2.75) | 0.021 |
| Men                        |                                             |                   |       |                                             |                   |       |
| No. of participants        | 472                                         | 58                |       | 442                                         | 77                |       |
| No. of cases (%)           | 24 (5.1)                                    | 4 (6.9)           |       | 29 (6.6)                                    | 3 (3.9)           |       |
| Crude ORs                  | 1.00                                        | 1.38 (0.46, 4.14) | 0.562 | 1.00                                        | 0.58 (0.17, 1.94) | 0.375 |
| Multivariable adjusted ORs | 1.00                                        | 1.40 (0.46, 4.27) | 0.558 | 1.00                                        | 0.55 (0.16, 1.86) | 0.334 |

Multivariable model: Adjusted for age, sex, BMI, dyslipidemia, modified Charlson Comorbidity Index, history of hospitalization in the past 1 year, marital status, and living alone.
